# Supplementary material
Source: PubMed Central journal article supplement (PMC4201592)

## Supplementary Figure 1. RCASP.GFP control gonads.

Gonadal sex differentiation proceeds normally in embryonic chicken gonads electroporated with RCASBP.GFP control virus. Figures below show GFP delivery into gonads following electroporation at E2.3. Fibronectin staining is normal in both sexes, while AMH and Aromatase proteins are confined to male and female gonads, respectively. DMRT1 protein expression is normal (shown in red bottom left).

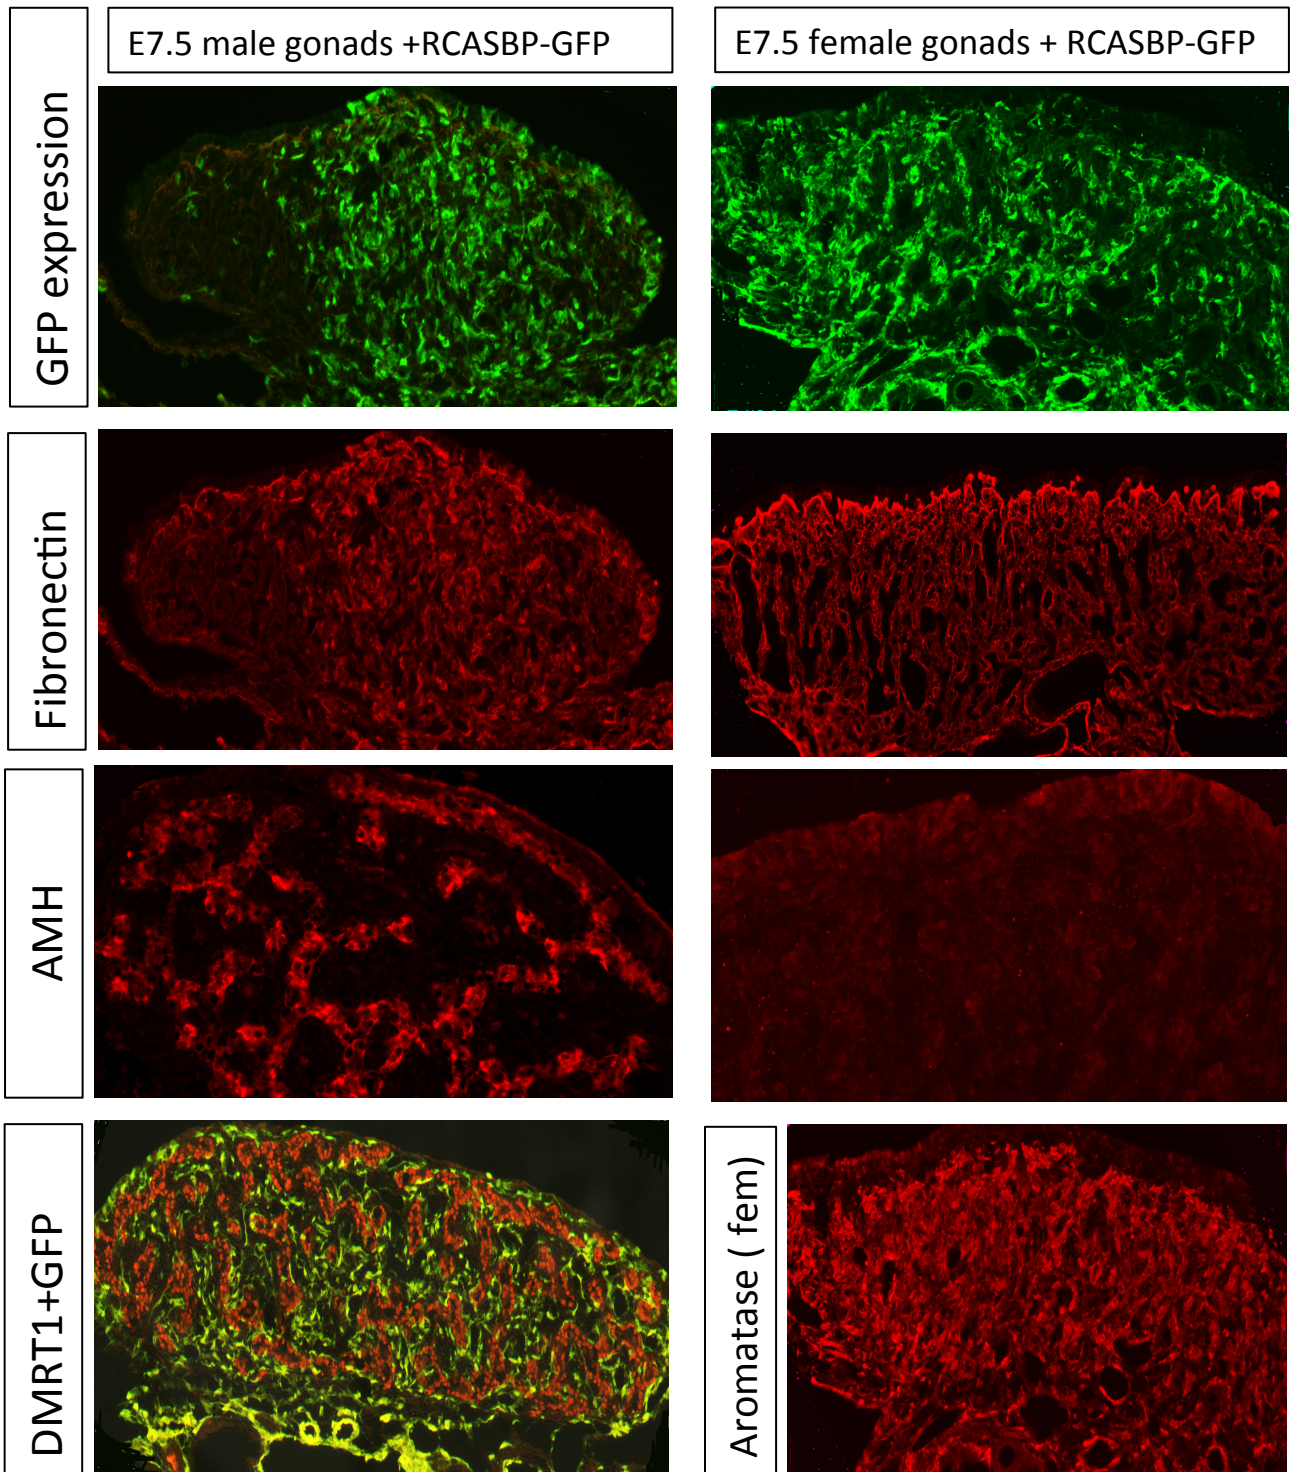

Supplement: NIHMS633367-supplement.pdf [file NIHMS633367-supplement.pdf]
